# Supplementary material for: From semiconductors to semimetals: bismuth as a photocatalyst for NO oxidation in air
Source: Royal Society of Chemistry journal article supplement (doi:10.1039/c4ta01339e), 2014-01-01
Supplement: c4ta01339e1.pdf [file c4ta01339e1.pdf]

## Supporting Information

### From Semiconductors to Semimetals: Bismuth as Photocatalyst for NO Oxidation in Air

Qian Zhang, Ying Zhou\*, Fang Wan, Fan Dong, Wei Li, Haimin Li and Greta R. Patzke

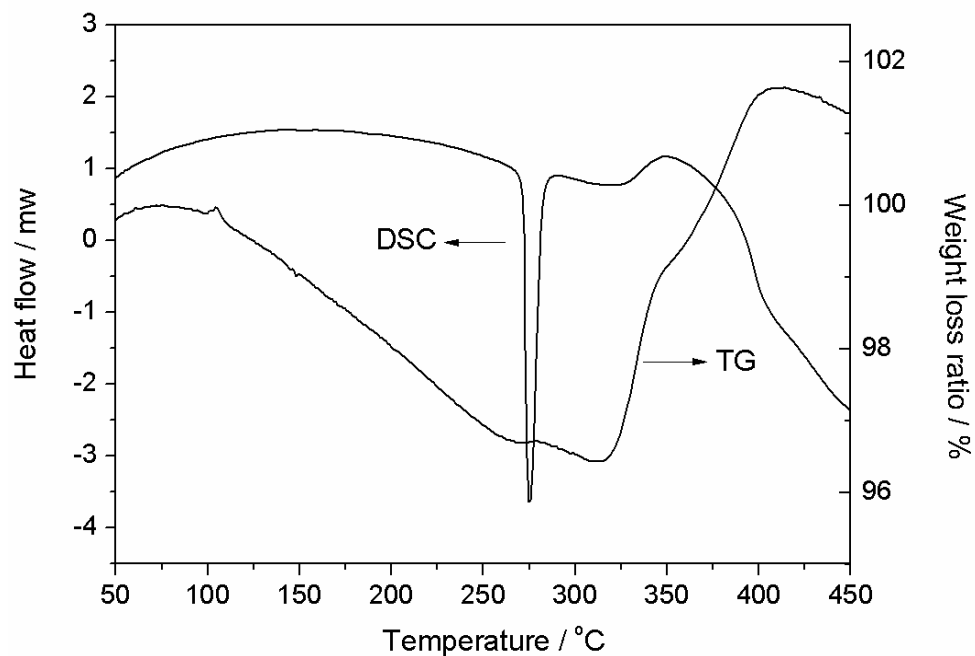

Figure S1. TG/DSC characterization of as-synthesized Bi films.

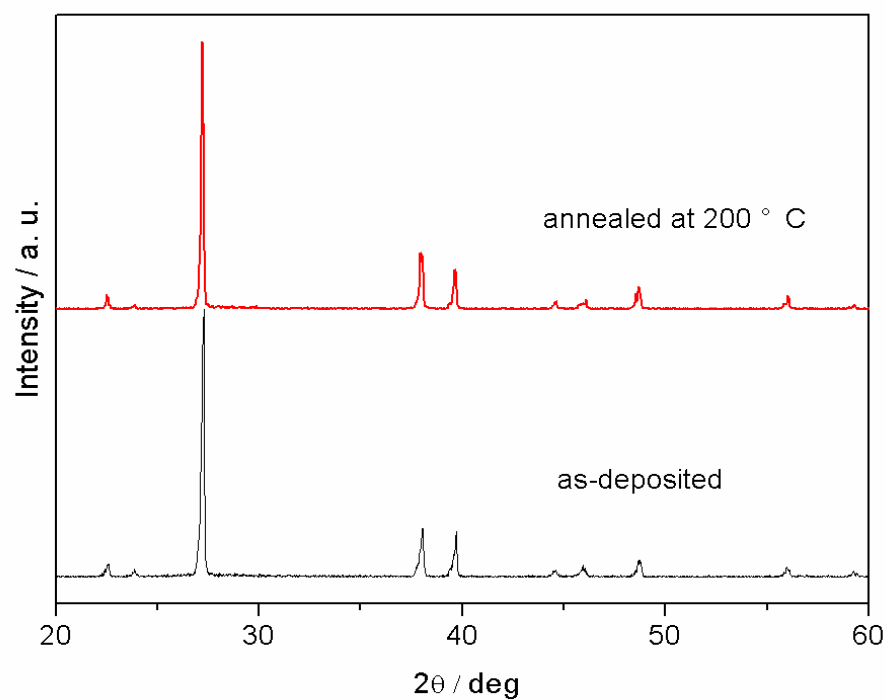

Figure S2. Synchrotron PXRD patterns of as-deposited and annealed (200 °C) Bi films.

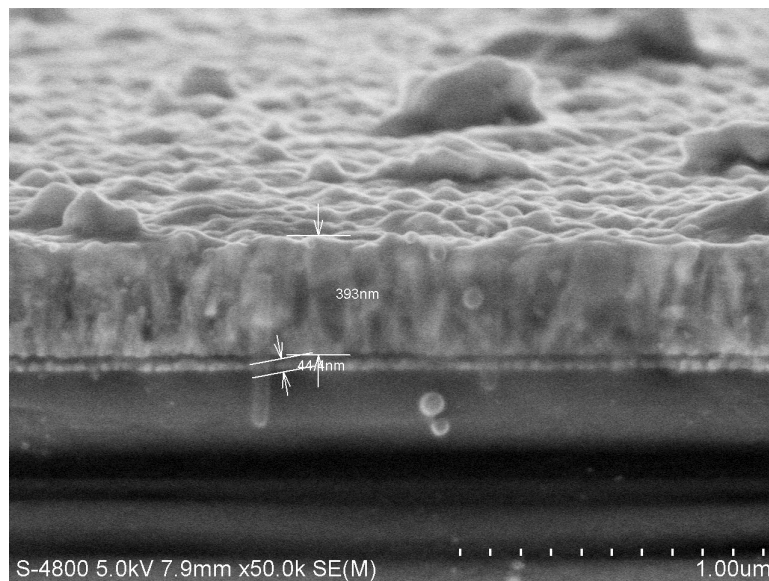

**Figure S3.** Representative cross-sectional SEM image of as-deposited Bi film.

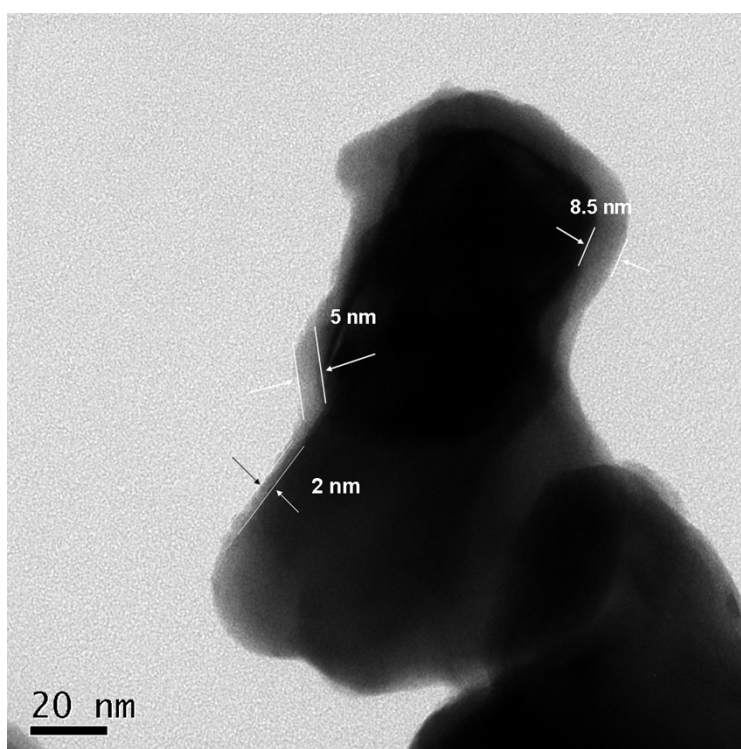

**Figure S4.** Representative TEM image of Bi particles.

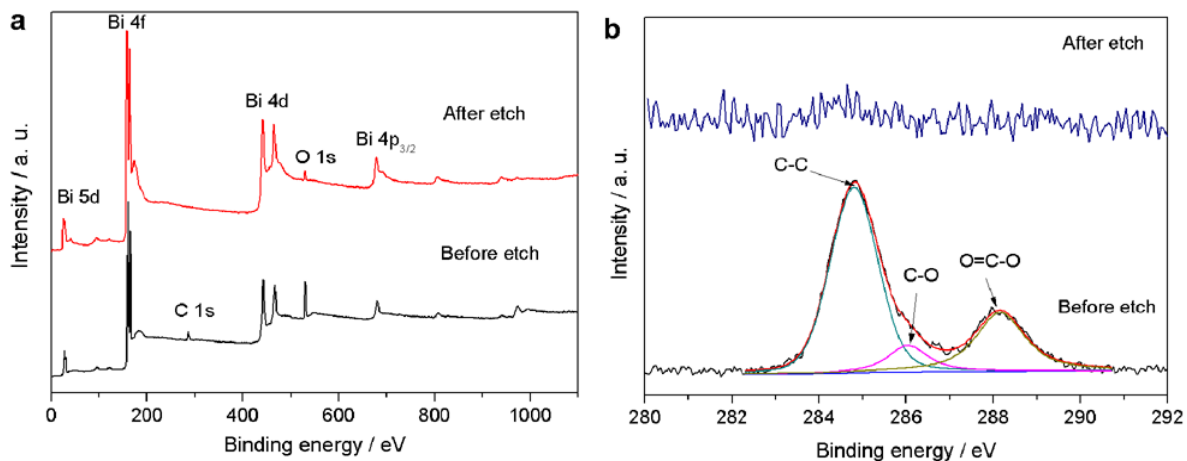

**Figure S5.** (a) Representative survey and (b) C 1s XPS spectra of Bi particles before and after ion etching.

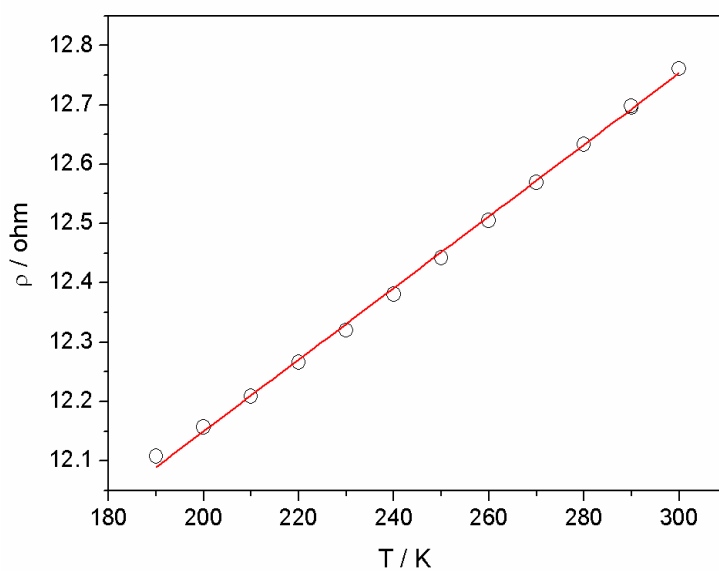

**Figure S6.** Temperature dependence of the electrical resistivity for Bi films.

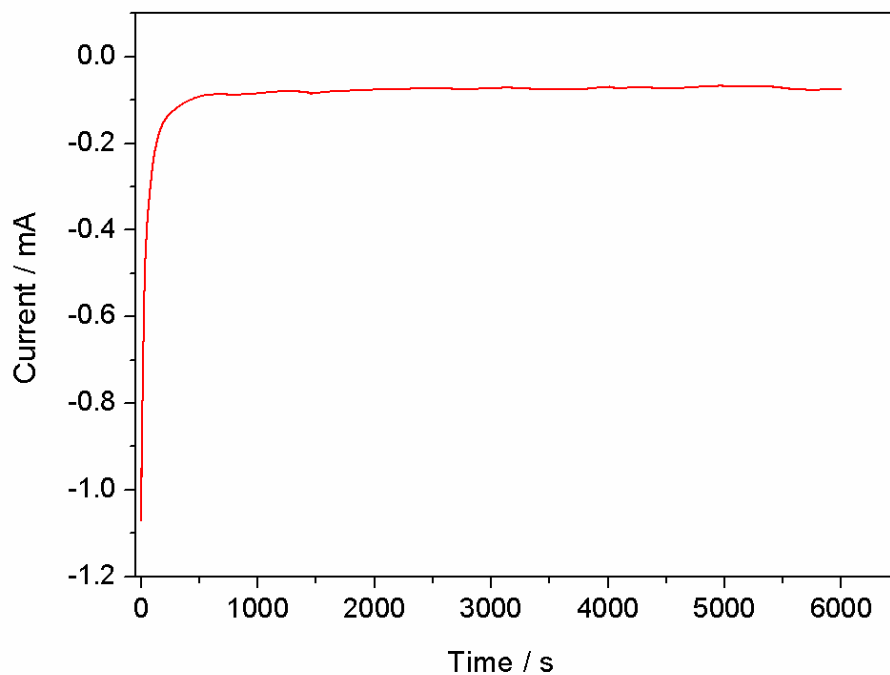

**Figure S7.** Current-time curve for the reduction process of Bi films.

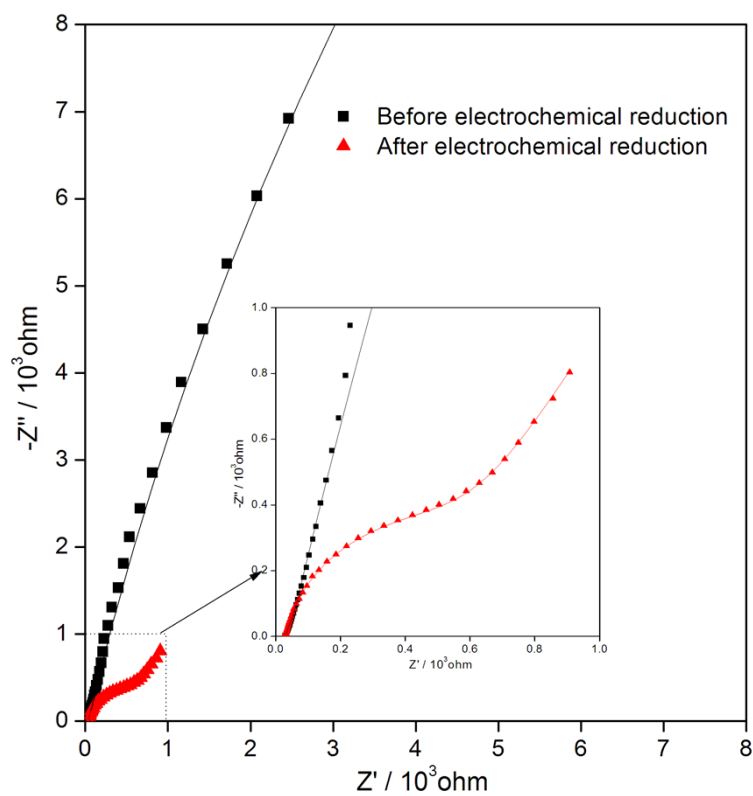

**Figure S8.** Electrochemistry impedance spectroscopy (EIS) for the Bi electrode before and after electrochemical reduction in 0.5M Na<sub>2</sub>SO<sub>4</sub> solution.

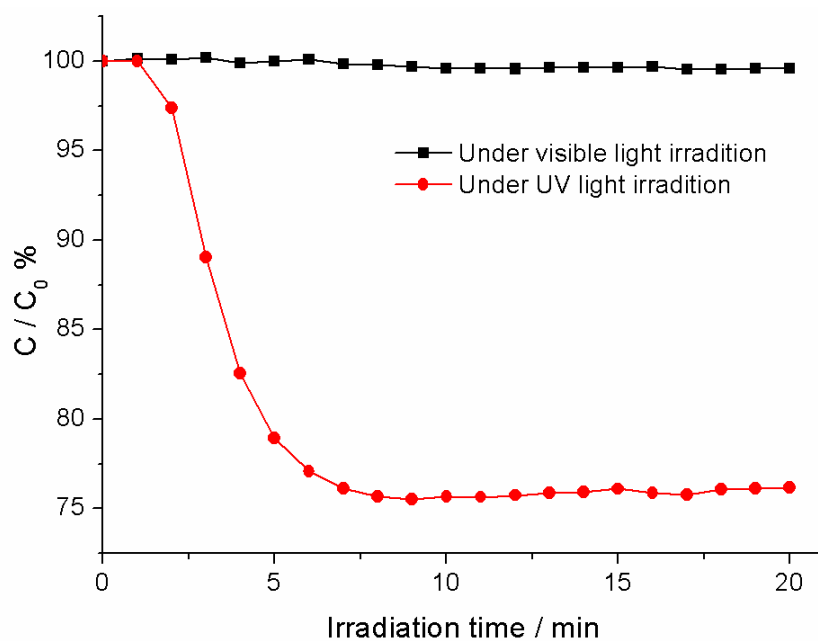

**Figure S9.** Photocatalytic activity of Bi films under UV and visible light irradiation for removal of NO in air.

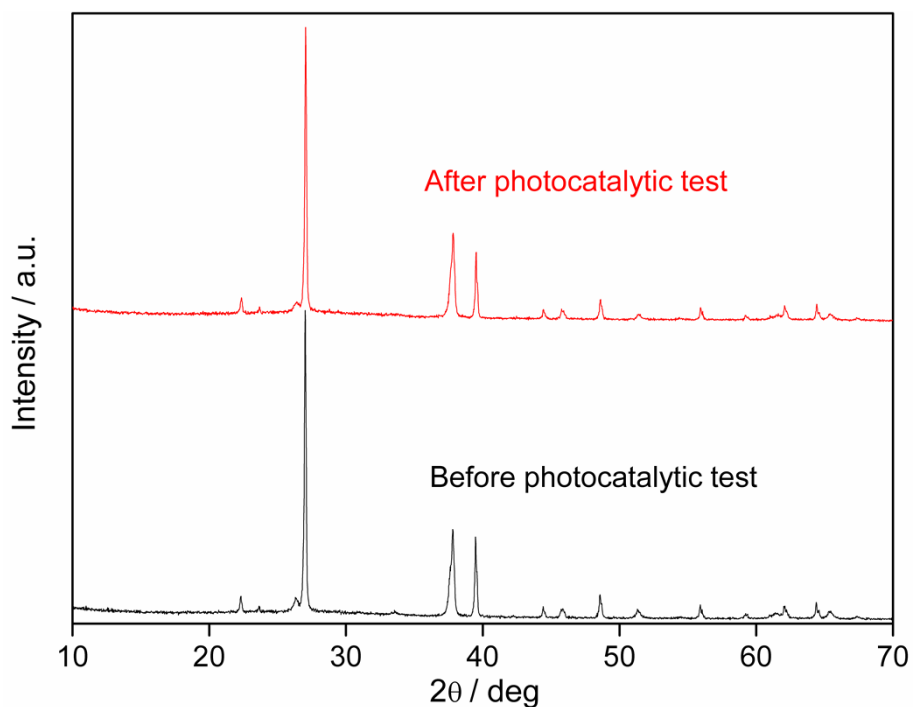

**Figure S10.** PXRD patterns of Bi films before and after photocatalytic tests.

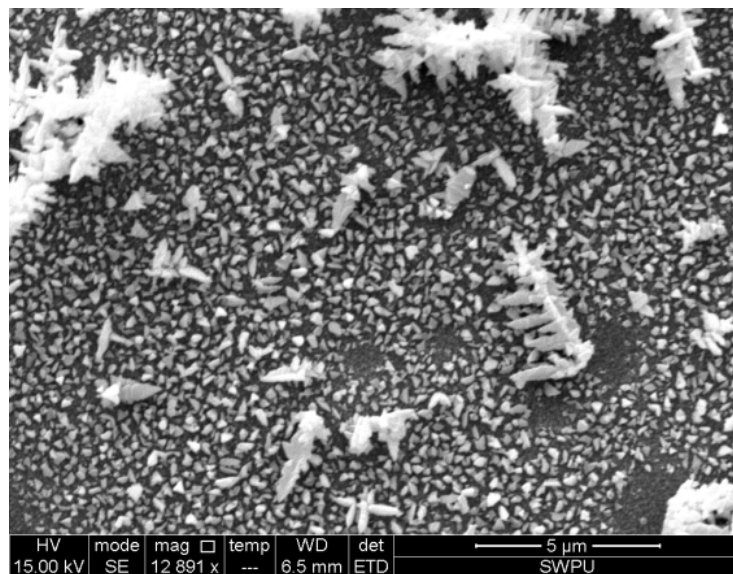

**Figure S11.** SEM image of Bi films after photocatalytic tests.

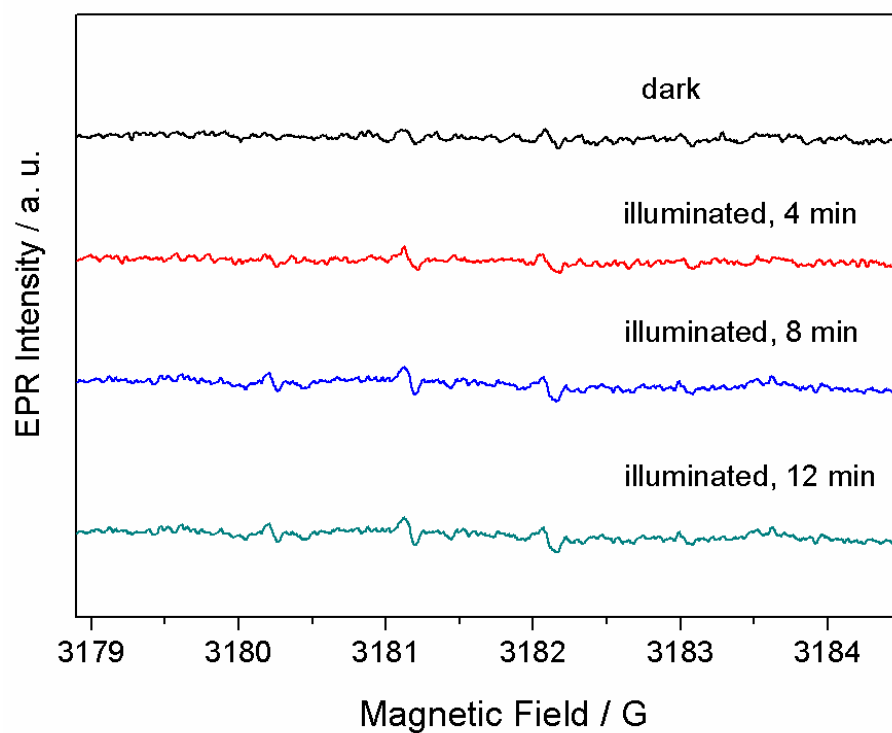

**Figure S12.** Time-dependent ESR spectra of DMPO-•OH for Bi films in the dark and under UV light irradiation.

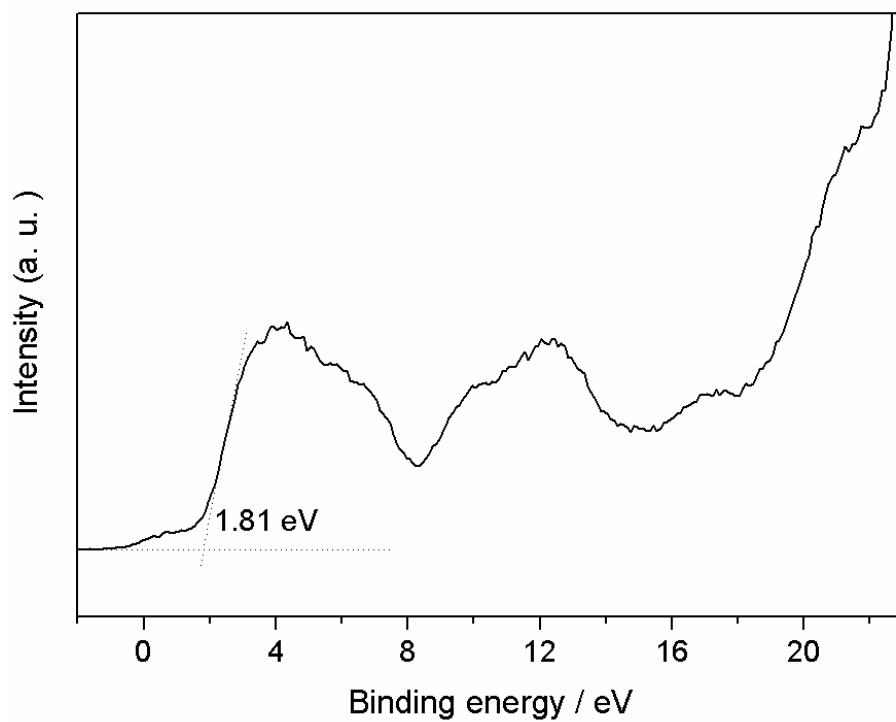

**Figure S13.** Typical XPS valence band spectrum of Bi films.
